# Supplementary material for: Fatty acid biomarkers reveal the interaction between two highly migratory species in the Southern Humboldt System: the swordfish and its prey, the jumbo squid
Source: PeerJ. 2025 Mar 18;13:e19129. doi: 10.7717/peerj.19129 (PMC11927563; doi:10.7717/peerj.19129)
Supplement: Supplemental Information 1 [file peerj-13-19129-s001.xlsx]

## Sheet: D.gigas
Male individuals																				Female individuals																		Digestive gland			Gonad			Mantle muscle
Digestive gland	Fatty Acids	M-1	M-2	M-4	M-7	M-8	M-9	M-12	M-13	M-15	MQ-1	MQ-3	MQ-5	MQ-6	MQ-10	MQ-11	MQ-12	MQ-13	MQ-14	M-3	M-5	M-6	M-10	M-11	M-14	MQ-2	MQ-4	MQ-7	MQ-8	MQ-9	MQ-15	MQ-16	MQ-17				Fatty acids	Mean	SD	%	Mean	SD	%	Mean	SD	%
SFA	C8:0	0.1335	0.27825	0.1735	0.15625	0.12425	0.15275	0.138	0.1085	0.18675	0.1285	0.24825	0.199	0.15975						0.15825		0.155	0.14075	0.1255	0.147	0.092	0.13775	0.2085	0.22775	0.16375						SFA	C8:0	0.162761	0.0447333	0.0531106	0.216885	0.0434202	0.86825	0.262458	0.029529	1.3728			SFA
	C12:0	0.21025	0.37575	0.5845	0.2865	0.38325	0.2095	0.454	0.428	0.342	0.33875	0.4505	0.3165	0.38825	0.289		0.25	0.307	0.4035			0.3565	0.26425	0.398	0.43325	0.45	0.25175	0.36475	0.392	0.32825	0.69875	0.289	0.3885				C12:0	0.366629	0.104509	0.119635	0.7765	#DIV/0!	3.10854
	C13:0					0.238				0.262		0.307	0.19825	0.344								0.23125			0.3435	0.25225			0.26225								C13:0	0.270944	0.050438	0.088412
	C14:0	10.7483	18.632	14.781	10.583	19.6345	12.1233	16.8932	18.3472	14.0115	19.8122	23.4325	17.6103	21.543	16.3035	6.998	7.58225	14.497	14.7197	17.0822	9.71475	18.0167	10.251	15.3782	18.098	13.676	10.3908	9.19725	20.2078	15.5185	12.9645	10.213	17.959				C14:0	14.9038	4.22955	4.86325	0.280516	0.123543	1.12298	0.20675	0.00507445	1.08142
	C15:0	1.39625	2.491	1.94075	1.3155	1.69525	1.495	2.0875	2.48475	1.64675	1.5895	2.3945	2.061	2.2245	1.50875	0.91125	0.84225	1.36675	1.47025	2.27925	1.36775	2.04925	1.341	1.626	2.2615	1.857	1.338	1.04575	1.90975	1.58725	1.31925	1.294	1.60975				C15:0	1.68147	0.445689	0.548681
	C16:0	37.4323	63.8585	56.8057	40.281	64.8125	53.1575	62.1773	66.7147	48.586	68.9483	77.8855	59.9467	77.5447	56.9265	31.3085	31.4127	48.3302	51.745	56.2187	38.917	70.941	49.146	58.9082	69.0537	50.2152	37.4185	33.432	72.283	50.154	43.4055	39.146	55.8972				C16:0	53.8441	13.4267	17.5699	4.34083	0.96487	17.3775	3.52844	0.544502	18.4557
	C17:0	1.7	2.89775	2.385	1.83075	1.76425	2.01775	2.82975	3.41225	2.099	1.86225	2.946	2.37575	2.622	2.136	1.3735	1.43825	2.05025	2.23025	3.01575	1.795	2.5325	1.91025	2.3555	2.68275	2.27875	1.7885	1.5635	2.228	1.9565	2.0285	1.4615	2.319				C17:0	2.18396	0.497733	0.712649	0.4102	0.137398	1.64214			0
	C18:0	8.48275	15.7363	14.7283	9.18375	10.1555	12.2325	14.4718	18.3233	10.6337	11.7703	15.7073	13.1918	17.2387	11.3108	8.22225	8.28	11.165	11.2065	13.695	10.9398	15.7125	12.662	17.088	16.1047	13.619	10.3042	10.407	13.9307	10.164	10.897	9.51575	11.179				C18:0	12.4456	2.80259	4.06113	2.35766	0.880706	9.43833	1.22902	0.269274	6.42847
	C20:0	0.86225	2.36975	1.18975	0.9395	1.551	0.86425	1.79275	1.67025	1.6295	1.39175	2.08325	1.78775	2.01875	1.2795	0.67225	1.09225	1.65575	1.023	1.7245	0.84975	1.72475	0.96575	1.13875	1.5605	2.238	1.09275	1.367	1.85425	1.882	1.179	0.91175	1.43575				C20:0	1.43118	0.447648	0.467009
	C23:0	1.943			1.9425	2.3985	1.8925	4.50325	5.7415	3.30775	2.17375	5.1815	3.755	2.886	2.50625	1.33575	1.34125	2.28775	4.34375	4.69175	2.5215	3.0405	3.57325	4.61375	4.16125	3.36225	1.441	2.7645	3.223	2.51525	2.1595	3.01725	3.50525				C23:0	3.071	1.15793	1.0021
MUFA	C14:1	0.614				0.33525				0.23575	0.282	0.41625	0.26925	0.32775	0.18525							0.274			0.2215				0.29175	0.237							TOTAL SFA	90.3614	17.1188	29.4859	8.38259	1.83332	33.5577	5.22667	1.41464	27.3383			TOTAL SFA
	C16:1	8.33525	14.4693	15.3718	8.06975	18.113	10.4697	13.8145	15.6312	13.8588	16.0138	22.0778	16.6642	22.399	16.4025	7.8475	6.678	10.6875		14.108	10.5828	17.993	10.4078	14.1665	17.0595	9.91625	8.05425	7.31025	20.7945	13.177	10.3298	10.0235	14.4865			MUFA	C14:1	0.307479	0.113974	0.100334									MUFA
	C17:1	1.27325	1.32875	2.2885	1.103	1.52525	1.88625	1.731	6.46475	2.194	1.6065	3.06125	2.56925	2.97025	4.91825	2.885	4.58075			1.4565	4.5175	2.35	1.44975	1.31625	2.17425	4.79575			2.6835	2.15125			7.17925				C16:1	13.3972	4.35284	4.37164	0.292	#DIV/0!	1.16895	3.91175	#DIV/0!	20.4606
	C18:1n9	23.3225	32.8593	31.54	14.6382	54.1735	21.1633	33.5435	52.2055	25.0805	35.4573	39.4438	35.1497	42.5932	38.5682	21.7087	16.7243	27.93		38.411	33.785	45.6018	26.9047	29.4925	53.331	39.4615	19.4985	25.6268	51.8385	27.2767							C17:1	2.78692	1.64002	0.909402
	C20:1	8.7425	12.1975	16.2782	6.4765	22.1425	10.9002	20.3837	19.1567	11.8302	17.5385	18.8577	16.948	20.847	16.4695	11.8123	8.016	12.767		12.702	11.3877	25.7147	15.718	18.5415	20.6558	13.2575	7.51525	8.525	21.1312	12.4482			14.6837				C18:1n9	33.4761	11.1518	10.9236	0.651917	0.242321	2.6098	0.46525	0.196807	2.43351
	C22:1n9	2.177			1.49675	9.51575	2.5325	5.54775	4.07325	1.018		2.6755		6.40925	4.29375	2.15725	2.74225	3.68575	1.96825	2.8705		7.98875	2.669	2.88175	5.41125	6.371	2.6395	3.20175	2.80925	4.4635	3.34325						C20:1	14.9533	4.97897	4.87941	3.08759	0.718604	12.3605	1.08582	0.174178	5.67943
	C24:1	1.19025	1.93675	2.922	1.28525	2.98325	1.43925	2.5245	3.288	1.49925	2.78825	3.17525	2.8005	3.11175	2.35225		1.88875	2.14925	3.0305	2.7385	1.9385	3.66925	1.915	3.148	2.85175	3.26825	1.481	2.15525	3.12625	1.87825	2.36375	1.96175					C22:1n9	3.7977	2.05811	1.23923
PUFA n6	C18:2n6t	1.69075	3.08675	1.75675	1.73025	2.9555	1.6715	3.244	3.96925	2.78625	2.4925	4.18225	3.3965	3.40175	3.089	1.426	1.1465	2.1955	3.00225	3.89475	2.1885	3.47625	2.0105	2.05675	2.94475	2.20625	1.7795	1.682	3.74875	2.82975	2.77625	1.548	3.32125				C24:1	2.42868	0.689295	0.792505
	C18:3n6	0.6005		1.538	0.63625	0.96225	0.93825	1.1025	1.102	1.175	1.008	1.49375	1.12425	1.97325	0.9285	0.592		0.698	0.84025		0.81275	1.243	0.895	1.49675	1.51025	0.587	0.55475		1.373	0.73675	0.50175	0.5985	1.04425				TOTAL MUFA	71.1473	12.0641	23.2161	4.03151	1.34784	16.1392	5.46282	0.563767	28.5735			TOTAL MUFA
	C20:2	1.874	3.40625	4.07425	2.1435	2.38725	1.695	4.06075	4.68675	2.66525	2.10025	4.158	3.12225	4.12825	2.898	2.27025	1.899	3.4955	3.718	3.68175	1.9705	3.46575	2.16775	3.1685	4.408	2.00975	1.9925	2.31275	3.324	2.594	2.72425	2.22225	4.137			PUFA n6	C18:2n6t	2.6152	0.83783	0.853368									PUFA n6
	C20:3n6							0.92875	1.15825	0.78675		0.906	0.683	1.27175								0.7775		0.891	1.19475				0.81425								C18:3n6	1.00238	0.371867	0.327085
	C20:4n6								1.34325			0.9745		1.04625	0.7885				0.83125			1.11825											1.0455				C20:2n6	2.96754	0.890067	0.968339
PUFA n3	C18:3n3	2.6055	4.746	3.99525	2.84975	2.89225	2.57875	4.67425	5.36125	3.5855	2.6455	5.51125	4.5375	4.3335	3.572	1.58625	1.5135	3.08825	3.55525	5.44725	2.63575	4.1935	2.3475	2.925	4.15975	2.92675	2.52225	3.07075	4.21075	3.35525	3.6485	1.9825	4.098				C20:3n6	0.9412	0.199447	0.307123
	C20:3n3	1.81325	3.70225	4.532	2.2225	3.60025	2.16925	4.28975	5.2995	3.4185	3.14425	4.80925	3.87175	5.324	3.77675	2.11175	1.58175	3.517	3.6035	4.4115	2.652	4.258	3.06525	3.63875	4.7515	3.40675	2.0225	2.85625	4.47875	3.33	2.32475	2.76575	4.96025				C20:4n6	1.02107	0.185636	0.333186
	C20:5n3	24.781	42.585	63.489	32.9582	44.055	40.468	58.9808	59.0825	53.9868	43.2705	76.2345	57.18	80.7632	47.548	20.3998	13.996	39.6532		48.753	35.7028	55.7595	40.6695	64.5192	65.1522	30.682	18.3685	29.0233	59.611	36.8822	21.289						TOTAL PUFA n6	8.54739	1.13127	2.7891	0		0	0		0			TOTAL PUFA n6
	C22:6n3	45.8465	96.907	94.4613	57.7848	80.8498	50.143	118.581	121.693	85.4673	64.94	133.432	102.846	119.751	84.0925	36.3462	30.7688	87.149		122.517	67.0187	99.9587	74.7253	91.4907	109.745	85.1252	34.693	82.0268	103.945	70.7445			94.7525			PUFA n3	C18:3n3	3.47359	1.06545	1.13347									PUFA n3
																																					C20:3n3	3.49091	1.0438	1.13912	0.912446	0.279236	3.65276
																																					C20:5n3	45.0291	17.3598	14.6935	5.48265	2.46181	21.9485	2.31909	0.765799	12.1301
Gonad	Fatty Acids	M-1	M-2	M-4	M-7	M-8	M-9	M-12	M-13	M-15	MQ-1	MQ-3	MQ-5	MQ-6	MQ-10	MQ-11	MQ-12	MQ-13	MQ-14	M-3	M-5	M-6	M-10	M-11	M-14	M-17	M-19	M-22	M-23	M-24	M-30	M-31	M-32				C22:6n3	84.4069	27.8392	27.5429	6.1704	2.84045	24.7018	6.10987	2.3213	31.958
SFA	C8:0	0.2915	0.24575	0.194	0.23875	0.22425	0.1885	0.1785	0.12975	0.23525	0.178	0.16425	0.2455	0.18925						0.12625	0.2215	0.19275	0.2535	0.273	0.24125	0.2915	0.22375	0.22225	0.224	0.23225							TOTAL PUFA n3	136.401	37.1266	44.5089	12.5655	3.16017	50.3031	8.42897	2.58868	44.0881			TOTAL PUFA n3
	C12:0										0.7765																										TOTAL PUFA	144.948	30.9724	47.298	12.5655	3.16017	50.3031	8.42897	2.58868	44.0881			TOTAL PUFA
	C14:0	0.225	0.524				0.239		0.29425	0.198	0.21325					0.1255	0.1215			0.37375		0.3225				0.54225			0.34975	0.2555	0.2855	0.1405	0.278				FA TOTAL	306.457	22.0857	100	24.9796	2.56992	100	19.1185	2.22419	100			FA TOTAL
	C16:0	5.05475	7.044	4.34275	5.2155	3.37325	4.67675	3.62775	5.368	5.434	4.336	4.4765	3.89825	4.5795	3.26125	4.4705	3.553	2.99075	4.19975	5.8705	3.55	4.36275	2.62275	3.70875	3.482	5.53775	4.06375	3.766	4.6055	3.407	4.75425	3.54775	5.7255
	C17:0		0.654				0.405			0.52325		0.49275				0.38625		0.22975	0.23125	0.52175										0.32375			0.33425
	C18:0	1.959	2.16675	1.38625	1.86725	3.588	2.684	1.3265	2.46675	1.91075	1.6665	4.42475	1.3805	1.9645	1.8295	3.9285	1.29325	1.22275	1.50175	3.658	2.3665	2.08175	1.63725	2.30375	1.8655	3.36825	4.301	2.80175	2.789	2.11025	2.70325	2.22025	2.67125
MUFA	C16:1		0.292
	C18:1n9	0.4595	1.3135		0.56575	0.48425	0.65675	0.454		0.53425		0.67575	0.477	0.48475					0.37225	1.009	0.4225	0.8915		0.55025	0.5	0.8595	0.484	0.60875	1.0855	0.78275	0.854	0.4135	0.707
	C20:1	3.15875	4.6075	3.1545	2.97325	3.171	3.5605	2.7935	1.80875	3.34475	2.988	3.36475	2.71625	3.33725	1.704	4.659	2.2395	2.0825	2.48825	4.41725	3.15725	3.1345	2.12775	2.90925	2.575	3.57575	3.3245	3.4795	3.83675	2.61475	3.036	2.67025	3.7925
PUFA n3	C20:3n3	1.12525	1.53325		1.09225	1.35575	1.07325	0.96075		0.79825		0.9175	0.96225	0.66475				0.78675	0.966	1.02225		0.6505			0.66325	1.177	1.14425	0.90275	1.01775	0.4	0.46575	0.483	0.82375
	C20:5n3	7.7315	11.172	2.15675	7.64675	7.523	8.65625	5.61125		4.015	1.658	4.64375	6.90125	3.4995	1.5225	0.9225	2.8345	4.72775	6.52825	8.2265	4.60875	5.5365	4.44275	5.29575	5.356	8.11975	8.17775	6.459	7.65725	2.52375	3.5215	4.917	7.3695
	C22:6n3	9.243	11.8372	2.8965	7.56725	6.9065	9.77025	5.72825	1.91825	5.266	2.38975	5.195	7.16075	4.21	1.66975	1.46675	3.363	5.1885	7.202	11.0418	3.9445	5.92275	3.7225	6.45225	6.42525	10.1437	6.78625	6.733	7.44425	4.4195	5.48075	8.33575	11.6218
Mantle muscle	Fatty Acids	M-1	M-2	M-4	M-7	M-8	M-9	M-12	M-13	M-15	MQ-1	MQ-3	MQ-5	MQ-6	MQ-10	MQ-11	MQ-12	MQ-13	MQ-14	M-3	M-5	M-6	M-10	M-11	M-14	M-17	M-19	M-22	M-23	M-24	M-30	M-31	M-32
SFA	C8:0	0.26775	0.24375	0.24325	0.23825	0.27925	0.2935	0.24175	0.274	0.271	0.25225	0.3145	0.293	0.28025						0.20525	0.25675	0.2305	0.2525	0.2875	0.27825	0.2335	0.25525	0.2855	0.20575	0.31575
	C14:0	0.20125			0.21125															0.20775
	C16:0		4.0945	3.34725	3.507	3.36975	3.01375	2.3605	3.95375	3.3325	3.36	3.86475	3.688	3.256	3.6175	4.24	3.176	5.2525	3.517	3.48225	2.58675	3.26675	3.965	3.37	4.047	3.905	3.8805	2.82175	3.60825	3.7185	2.77925	3.46375	3.536
	C18:0	1.29225	1.6165	1.3225	1.04725	1.222	1.00425	0.8255	1.25225	1.12125	1.14	1.4345	1.0455	1.06875	1.42475	1.63025	0.9215	2	0.98675	1.47575	0.9035	0.95975	1.404	1.27225	1.3625	1.5545	1.1755	1.058	1.22875	1.1565	0.84325	1.59	0.98875
MUFA	C16:1	3.91175
	C18:1n9		0.75675									0.39325								0.38675												0.32425
	C20:1	1.26275	1.331	1.19375	1.0055	1.28725	0.96825	0.80625	0.995	1.01975	1.10825	1.26025	1.10425	1.046	0.8665		0.67725	1.176	0.77675	1.06725	0.89825	1.1175	1.1535	1.235	1.25425	1.45425	1.10575	1.029	1.00875	1.15175		1.12875
PUFA n3	C20:5n3	1.984	3.3905	1.97275	2.48675	2.845	2.49675	1.78975	2.69775	2.047	2.757	3.38975	2.52075	2.4695	1.5235		0.709	3.054	0.773	0.4785	1.93825	2.4185	2.551	2.946	2.76575	3.34525	2.12	2.66675	1.46375	2.82475		2.8285
	C22:6n3	6.09675	9.7865	6.22925	6.41775	7.1405	6.01975	4.3545	7.55025	5.74925	7.055	8.40825	7.12425	6.579	7.132	0.74875	2.47125	8.5685	4.3495	1.29825	4.8275	6.906	6.95825	7.54725	7.5395	9.289	6.56175	6.088	4.6985	7.83475	3.33675	9.505	1.3445
[truncated: 7 more columns]

## Sheet: X.gladius
					Gonad						Muscle						Liver
Gonad	Sample Code	Dry weight (g)					106						198 M						198 H(D5)						Gonad				Muscle				Liver
	106	0.05			FA	Name	Concentration (mg/L)	Concentration (mg)	FA (mg*g DW)		FA	Name	Concentration (mg/L)	Concentration (mg)	FA (mg*g DW)		FA	Name	Concentration (mg/L)	Concentration (mg)	FA (mg*g DW)			FA	Mean	sd	ee	%	Mean	sd	ee	%	Mean	sd	ee	%
	246	0.05			C6:0	Á. Caproico	0	0	0		C6:0	Á. Caproico	0	0	0		C6:0	Á. Caproico	0	0	0			C6:0	0	0	0	0	0	0	0	0	0	0	0	0
	198	0.05			C8:0	A. Caprílico	0	0	0		C8:0	A. Caprílico	0	0	0		C8:0	A. Caprílico	0	0	0			C8:0	0	0	0	0	0	0	0	0	0	0	0	0
	84	0.05			C10:0	A. Cáprico	0	0	0		C10:0	A. Cáprico	0	0	0		C10:0	A. Cáprico	0	0	0			C10:0	0	0	0	0	0	0	0	0	0	0	0	0
	119	0.05			C11:0	A. Undecílico	0	0	0		C11:0	A. Undecílico	0	0	0		C11:0	A. Undecílico	0	0	0			C11:0	0	0	0	0	0	0	0	0	0	0	0	0
	47	0.05			C12:0	A. Laurico	0	0	0		C12:0	A. Laurico	0.99	0.00495	0.099		C12:0	A. Laurico	0	0	0			C12:0	0.44	0.107	0.073	2.17748	0.099	0.054	0.016	0.0580484	0	0	0	0
	586	0.05			C13:0	A. Tridecílico	0	0	0		C13:0	A. Tridecílico	1.53	0.00765	0.153		C13:0	A. Tridecílico	0	0	0			C13:0	0	0	0	0	0.153	0.094	0.055	0.0897112	0	0	0	0
	63	0.05			C14:0	A. Merístico	0	0	0		C14:0	A. Merístico	70.47	0.35235	7.047		C14:0	A. Merístico	5.62	0.1405	2.81			C14:0	0.325286	0.342288	0.0914803	1.60978	4.537	2.25581	1.30239	2.66026	2.323	1.3055	0.753732	0.992108
	897	0.05			C14:1	A. Miristoleico	0	0	0		C14:1	A. Miristoleico	1.49	0.00745	0.149		C14:1	A. Miristoleico	0	0	0			C15:0	0.210167	0.0607402	0.0247971	1.04008	0.997	0.732862	0.423118	0.584588	0.429333	0.126437	0.0729985	0.18336
	66	0.05			C15:0	A. Pentadecílico	0	0	0		C15:0	A. Pentadecílico	18.35	0.09175	1.835		C15:0	A. Pentadecílico	0.73	0.01825	0.365			C16:0	2.21555	3.21304	0.577079	10.9643	26.0727	13.9473	8.05248	15.2876	23.9757	9.48253	5.47474	10.2395
	587	0.05			C15:1	A. Pentadecenoico	0	0	0		C15:1	A. Pentadecenoico	7.37	0.03685	0.737		C15:1	A. Pentadecenoico	0	0	0			C17:0	0.2814	0.163531	0.0517131	1.3926	1.431	1.08416	0.62594	0.839063	1.62	0.0141421	0.01	0.691871
	558	0.05			C16:0	A. Palmítico	9.15	0.04575	0.915		C16:0	A. Palmítico	409.15	2.04575	40.915		C16:0	A. Palmítico	63.86	1.5965	31.93			C18:0	1.09477	1.64268	0.295033	5.41783	12.3967	7.04153	4.06543	7.26875	22.189	15.6245	9.02079	9.47649
	201	0.05			C16:1	A. Palmitoleico	1.02	0.0051	0.102		C16:1	A. Palmitoleico	83.55	0.41775	8.355		C16:1	A. Palmitoleico	9.87	0.24675	4.935			C20:0	0	0	0	0	0.559	0.479418	0.339	0.327768	0.675	0.131	0.085	0.288279
	341	0.05			C17:0	A. Margárico	0	0	0		C17:0	A. Margárico	26.71	0.13355	2.671		C17:0	A. Margárico	3.22	0.0805	1.61			C21:0	0.182	0.113	0.065	0.900684	0.683	0.144	0.108	0.400475	0	0	0	0
	111	0.05			C17:1	A. Heptadecenoico	0	0	0		C17:1	A. Heptadecenoico	24.25	0.12125	2.425		C17:1	A. Heptadecenoico	2.69	0.06725	1.345			C22:0	0	0	0	0	0.398	0.078	0.034	0.233366	0	0	0	0
	75	0.05			C18:0	A. Estearico	4.34	0.0217	0.434		C18:0	A. Estearico	203.54	1.0177	20.354		C18:0	A. Estearico	76.65	1.91625	38.325			C23:0	0.794222	0.488715	0.162905	3.93046	1.557	1.28835	0.911	0.912943	3.233	2.32653	1.34322	1.38075
	28	0.05			C18:1n9	A. Oleico	9.65	0.04825	0.965		C18:1n9	A. Oleico	936.53	4.68265	93.653		C18:1n9	A. Oleico	321.81	8.04525	160.905			C24:0	0.203	0.0834386	0.059	1.00461	0.234	0.123	0.087	0.137205	15.637	21.7266	15.363	6.67826
	343	0.05			C18:2n6t	A. Linoelaidico	0	0	0		C18:2n6t	A. Linoelaidico	22.32	0.1116	2.232		C18:2n6t	A. Linoelaidico	2.34	0.0585	1.17			TOTAL SFA	5.7464	2.09644	0.204592	28.4378	49.1173	9.89466	2.01974	28.7998	70.082	12.7165	2.8435	29.9307
	630	0.05			C18:2n6c	A. Linoleico	0	0	0		C18:2n6c	A. Linoleico	6.91	0.03455	0.691		C18:2n6c	A. Linoleico	1.6	0.04	0.8			C14:1n-5	0.091	0.0314325	0.0181475	0.450342	0.149	0.099	0.046	0.0873658	0.077	0.034	0.012	0.0328852
	2	0.05			C18:3n3	A. α-Linolenico	0	0	0		C18:3n3	A. α-Linolenico	14.59	0.07295	1.459		C18:3n3	A. α-Linolenico	0	0	0			C15:1	0	0	0	0	0.4105	0.461741	0.3265	0.240696	0	0	0	0
	82	0.05			C18:3n6	A. caléndico	0	0	0		C18:3n6	A. caléndico	4.11	0.02055	0.411		C18:3n6	A. caléndico	0	0	0			C16:1n-7	0.485875	0.592517	0.120947	2.4045	6.47333	2.3031	1.32969	3.79562	5.72167	2.92543	1.689	2.44361
	644	0.05			C20:0	A. Araquídico	0	0	0		C20:0	A. Araquídico	8.98	0.0449	0.898		C20:0	A. Araquídico	1.35	0.03375	0.675			C17:1	0.270667	0.125409	0.0511981	1.33948	1.34533	0.939292	0.542301	0.788833	1.78	0.615183	0.435	0.760203
	80	0.05			C20:1	A. Gadoleico	1.75	0.00875	0.175		C20:1	A. Gadoleico	143.01	0.71505	14.301		C20:1	A. Gadoleico	51.38	1.2845	25.69			C18:1n-9	4.29214	7.08222	1.31513	21.241	65.9853	29.3233	16.9298	38.6903	112.91	66.3652	38.3159	48.2218
	53	0.05			C20:2	A. Eicosadienoico	0	0	0		C20:2	A. Eicosadienoico	7.75	0.03875	0.775		C20:2	A. Eicosadienoico	1.62	0.0405	0.81			C20:1n-9	0.978278	1.2367	0.291494	4.84131	9.21033	5.43879	3.14008	5.40046	17.178	11.7407	6.77849	7.33639
	720	0.05			C20:3n6	A. Dihomo-gamma-linolenico	0	0	0		C20:3n6	A. Dihomo-gamma-linolenico	0	0	0		C20:3n6	A. Dihomo-gamma-linolenico	0	0	0			C22:1n-9	0.379	0.132924	0.0664618	1.8756	1.65	1.11042	0.641099	0.967473	2.4275	0.222739	0.1575	1.03674
	264	0.05			C20:3n3	A. eicosatrienoico	1.41	0.00705	0.141		C20:3n3	A. eicosatrienoico	26.25	0.13125	2.625		C20:3n3	A. eicosatrienoico	4.16	0.104	2.08			C24:1n-9	0.244	0.0877097	0.0506392	1.20751	1.626	1.02513	0.591862	0.953401	0	0	0	0
	130	0.05			C20:4n6	A. araquidonico	0	0	0		C20:4n6	A. araquidonico	6.83	0.03415	0.683		C20:4n6	A. araquidonico	0	0	0			TOTAL MUFA	6.74096	4.60303	0.511447	33.3597	86.8498	24.5422	5.35555	50.9242	140.094	52.6204	14.0634	59.8316
	110	0.05			C20:5n3	A. Eicosapentaenoico	0	0	0		C20:5n3	A. Eicosapentaenoico	55.65	0.27825	5.565		C20:5n3	A. Eicosapentaenoico	2.33	0.05825	1.165			C18:2n6t	0.224714	0.203311	0.0768442	1.11207	1.255	0.852173	0.492002	0.735866	1.33933	0.819232	0.472984	0.572003
	680	0.05			C21:0	A. heneicosanoico	0	0	0		C21:0	A. heneicosanoico	6.83	0.03415	0.683		C21:0	A. heneicosanoico	0	0	0			C18:2n6c	0.186	0.0353553	0.025	0.920479	0.44	0.354968	0.251	0.257993	0.605	0.299625	0.172988	0.258384
	853	0.05			C22:0	A. Behenoico	0	0	0		C22:0	A. Behenoico	3.98	0.0199	0.398		C22:0	A. Behenoico	0	0	0			C18:3n6	0.084	0.021	0.01	0.4157	0.27	0.199404	0.141	0.158314	0.465	0.139	0.086	0.198592
	117	0.05			C22:1n9	A. Erúcico	0	0	0		C22:1n9	A. Erúcico	29.05	0.14525	2.905		C22:1n9	A. Erúcico	5.17	0.12925	2.585			C20:2n6	0.204	0.0339411	0.024	1.00956	0.488	0.405879	0.287	0.286138	0.885	0.106066	0.075	0.377966
	103	0.05			C23:0	A. Tricosílico	0	0	0		C23:0	A. Tricosílico	24.68	0.1234	2.468		C23:0	A. Tricosílico	6.17	0.15425	3.085			C20:3n6	0	0	0	0	0	0	0	0	0	0	0	0
	12	0.05			C22:6n3	DHA	19.54	0.0977	1.954		C22:6n3	DHA	472.19	2.36095	47.219		C22:6n3	DHA		0	0			C20:4n6	0.182	0.054	0.028	0.900684	0.683	0.129	0.093	0.400475	0	0	0	0
Muscle					C24:0	A. Lignocérico	0	0	0		C24:0	A. Lignocérico	2.34	0.0117	0.234		C24:0	A. Lignocérico	62	1.55	31			TOTAL PUFA n-6	0.880714	0.159738	0.0443033	4.35849	3.136	0.630475	0.199374	1.83879	3.29433	0.606066	0.202022	1.40695
	198M	0.05			C24:1	A. nervonico	0	0	0		C24:1	A. nervonico	28.07	0.14035	2.807		C24:1	A. nervonico	0	0	0			C18:3n3	0.278	0.17166	0.0991077	1.37577	1.0105	0.634275	0.4485	0.592504	0.499	0.199404	0.141	0.213113
	28M	0.05					Sum	0.2343					Sum	13.2373					Sum	15.5642				C20:3n3	0.543947	0.608589	0.13962	2.69189	1.44633	1.02208	0.590098	0.848054	2.095	0.0785812	0.0453689	0.894734
	119M	0.05																						C20:5n3	1.03045	1.1609	0.350026	5.09953	4.002	1.62522	0.938319	2.34656	1.341	0.199682	0.115287	0.572715
Liver							246						28 M (D5)						28 H (D2)					C22:6n3	4.9864	7.37063	1.47413	24.6768	24.9853	19.2965	11.1409	14.6501	16.742	0.746705	0.528	7.15018
	198H	0.05			FA	Name	Concentration (mg/L)	Concentration (mg)	FA (mg*g DW)		FA	Name	Concentration (mg/L)	Concentration (mg)	FA (mg*g DW)		FA	Name	Concentration (mg/L)	Concentration (mg)	FA (mg*g DW)			TOTAL PUFA n-3	6.8388	5.28117	0.693451	33.8439	31.4442	13.7475	4.14501	18.4372	20.677	6.4955	2.05406	8.83075
	28H	0.05			C6:0	Á. Caproico	0	0	0		C6:0	Á. Caproico	0	0	0		C6:0	Á. Caproico	0	0	0			TOTAL PUFA	7.71952	4.8532	0.575969	38.2024	34.5802	10.5278	2.29735	20.276	23.9713	4.97044	1.1403	10.2377
	119H	0.05			C8:0	A. Caprílico	0	0	0		C8:0	A. Caprílico	0	0	0		C8:0	A. Caprílico	0	0	0			TOTAL FA	20.2069	3.89112	0.243671	100	170.547	16.2838	2.0044	100	234.148	29.6231	4.06904	100
					C10:0	A. Cáprico	0	0	0		C10:0	A. Cáprico	0	0	0		C10:0	A. Cáprico	0	0	0
					C11:0	A. Undecílico	0	0	0		C11:0	A. Undecílico	0	0	0		C11:0	A. Undecílico	0	0	0
					C12:0	A. Laurico	0	0	0		C12:0	A. Laurico	0	0	0		C12:0	A. Laurico	0	0	0
					C13:0	A. Tridecílico	0	0	0		C13:0	A. Tridecílico	0	0	0		C13:0	A. Tridecílico	0	0	0
					C14:0	A. Merístico	1.59	0.00795	0.159		C14:0	A. Merístico	7.77	0.19425	3.885		C14:0	A. Merístico	4.22	0.0422	0.844
					C14:1	A. Miristoleico	0	0	0		C14:1	A. Miristoleico	0	0	0		C14:1	A. Miristoleico	0	0	0
					C15:0	A. Pentadecílico	0	0	0		C15:0	A. Pentadecílico	1.36	0.034	0.68		C15:0	A. Pentadecílico	1.74	0.0174	0.348
					C15:1	A. Pentadecenoico	0	0	0		C15:1	A. Pentadecenoico	0	0	0		C15:1	A. Pentadecenoico	0	0	0
					C16:0	A. Palmítico	28.65	0.14325	2.865		C16:0	A. Palmítico	48.13	1.20325	24.065		C16:0	A. Palmítico	67.41	0.6741	13.482
					C16:1	A. Palmitoleico	4.24	0.0212	0.424		C16:1	A. Palmitoleico	14.32	0.358	7.16		C16:1	A. Palmitoleico	16.35	0.1635	3.27
					C17:0	A. Margárico	1.49	0.00745	0.149		C17:0	A. Margárico	1.92	0.048	0.96		C17:0	A. Margárico	0	0	0
					C17:1	A. Heptadecenoico	1.49	0.00745	0.149		C17:1	A. Heptadecenoico	1.79	0.04475	0.895		C17:1	A. Heptadecenoico	0	0	0
					C18:0	A. Estearico	9.94	0.0497	0.994		C18:0	A. Estearico	19.73	0.49325	9.865		C18:0	A. Estearico	35.66	0.3566	7.132
					C18:1n9	A. Oleico	97.34	0.4867	9.734		C18:1n9	A. Oleico	138.11	3.45275	69.055		C18:1n9	A. Oleico	185.88	1.8588	37.176
					C18:2n6t	A. Linoelaidico	0.77	0.00385	0.077		C18:2n6t	A. Linoelaidico	1.33	0.03325	0.665		C18:2n6t	A. Linoelaidico	3.09	0.0309	0.618
					C18:2n6c	A. Linoleico	0	0	0		C18:2n6c	A. Linoleico	0	0	0		C18:2n6c	A. Linoleico	1.3	0.013	0.26
					C18:3n3	A. α-Linolenico	0	0	0		C18:3n3	A. α-Linolenico	0	0	0		C18:3n3	A. α-Linolenico	1.79	0.0179	0.358
					C18:3n6	A. caléndico	0	0	0		C18:3n6	A. caléndico	0	0	0		C18:3n6	A. caléndico	0	0	0
					C20:0	A. Araquídico	0	0	0		C20:0	A. Araquídico	0	0	0		C20:0	A. Araquídico	0	0	0
					C20:1	A. Gadoleico	7.38	0.0369	0.738		C20:1	A. Gadoleico	19.7	0.4925	9.85		C20:1	A. Gadoleico	18.92	0.1892	3.784
					C20:2	A. Eicosadienoico	0	0	0		C20:2	A. Eicosadienoico	0	0	0		C20:2	A. Eicosadienoico	0	0	0
					C20:3n6	A. Dihomo-gamma-linolenico	0	0	0		C20:3n6	A. Dihomo-gamma-linolenico	0	0	0		C20:3n6	A. Dihomo-gamma-linolenico	0	0	0
					C20:3n3	A. eicosatrienoico	5.46	0.0273	0.546		C20:3n3	A. eicosatrienoico	1.61	0.04025	0.805		C20:3n3	A. eicosatrienoico	10.9	0.109	2.18
					C20:4n6	A. araquidonico	0	0	0		C20:4n6	A. araquidonico	0	0	0		C20:4n6	A. araquidonico	0	0	0
					C20:5n3	A. Eicosapentaenoico	3.15	0.01575	0.315		C20:5n3	A. Eicosapentaenoico	8.24	0.206	4.12		C20:5n3	A. Eicosapentaenoico	7.79	0.0779	1.558
					C21:0	A. heneicosanoico	0	0	0		C21:0	A. heneicosanoico	0	0	0		C21:0	A. heneicosanoico	0	0	0
					C22:0	A. Behenoico	0	0	0		C22:0	A. Behenoico	0	0	0		C22:0	A. Behenoico	0	0	0
					C22:1n9	A. Erúcico	0	0	0		C22:1n9	A. Erúcico	2.5	0.0625	1.25		C22:1n9	A. Erúcico	0	0	0
					C23:0	A. Tricosílico	6.92	0.0346	0.692		C23:0	A. Tricosílico	0	0	0		C23:0	A. Tricosílico	4.92	0.0492	0.984
					C22:6n3	DHA	53.48	0.2674	5.348		C22:6n3	DHA	30.27	0.75675	15.135		C22:6n3	DHA	81.07	0.8107	16.214
					C24:0	A. Lignocérico	0	0	0		C24:0	A. Lignocérico	0	0	0		C24:0	A. Lignocérico	1.37	0.0137	0.274
					C24:1	A. nervonico	0	0	0		C24:1	A. nervonico	2.21	0.05525	1.105		C24:1	A. nervonico	0	0	0
							Sum	1.1095					Sum	7.47475					Sum	4.4241
							198						119M						119H
					FA	Name	Concentration (mg/L)	Concentration (mg)	FA (mg*g DW)		FA	Name	Concentration (mg/L)	Concentration (mg)	FA (mg*g DW)		FA	Name	Concentration (mg/L)	Concentration (mg)	FA (mg*g DW)
					C6:0	Á. Caproico	0	0	0		C6:0	Á. Caproico	0	0	0		C6:0	Á. Caproico	0	0	0
					C8:0	A. Caprílico	0	0	0		C8:0	A. Caprílico	0	0	0		C8:0	A. Caprílico	0	0	0
					C10:0	A. Cáprico	0	0	0		C10:0	A. Cáprico	0	0	0		C10:0	A. Cáprico	0	0	0
					C11:0	A. Undecílico	0	0	0		C11:0	A. Undecílico	0	0	0		C11:0	A. Undecílico	0	0	0
					C12:0	A. Laurico	0	0	0		C12:0	A. Laurico	0	0	0		C12:0	A. Laurico	0	0	0
					C13:0	A. Tridecílico	0	0	0		C13:0	A. Tridecílico	0	0	0		C13:0	A. Tridecílico	0	0	0
					C14:0	A. Merístico	11.34	0.0567	1.134		C14:0	A. Merístico	26.79	0.13395	2.679		C14:0	A. Merístico	6.63	0.16575	3.315
					C14:1	A. Miristoleico	0.77	0.00385	0.077		C14:1	A. Miristoleico	0	0	0		C14:1	A. Miristoleico	0	0	0
					C15:0	A. Pentadecílico	3.04	0.0152	0.304		C15:0	A. Pentadecílico	4.76	0.0238	0.476		C15:0	A. Pentadecílico	1.15	0.02875	0.575
					C15:1	A. Pentadecenoico	0	0	0		C15:1	A. Pentadecenoico	0.84	0.0042	0.084		C15:1	A. Pentadecenoico	0	0	0
					C16:0	A. Palmítico	129.34	0.6467	12.934		C16:0	A. Palmítico	132.38	0.6619	13.238		C16:0	A. Palmítico	53.03	1.32575	26.515
					C16:1	A. Palmitoleico	24.51	0.12255	2.451		C16:1	A. Palmitoleico	39.05	0.19525	3.905		C16:1	A. Palmitoleico	17.92	0.448	8.96
					C17:0	A. Margárico	5.65	0.02825	0.565		C17:0	A. Margárico	6.62	0.0331	0.662		C17:0	A. Margárico	3.26	0.0815	1.63
					C17:1	A. Heptadecenoico	4.07	0.02035	0.407		C17:1	A. Heptadecenoico	7.16	0.0358	0.716		C17:1	A. Heptadecenoico	4.43	0.11075	2.215
					C18:0	A. Estearico	72.15	0.36075	7.215		C18:0	A. Estearico	69.71	0.34855	6.971		C18:0	A. Estearico	42.22	1.0555	21.11
					C18:1n9	A. Oleico	289.69	1.44845	28.969		C18:1n9	A. Oleico	352.48	1.7624	35.248		C18:1n9	A. Oleico	281.3	7.0325	140.65
					C18:2n6t	A. Linoelaidico	5.93	0.02965	0.593		C18:2n6t	A. Linoelaidico	8.68	0.0434	0.868		C18:2n6t	A. Linoelaidico	4.46	0.1115	2.23
					C18:2n6c	A. Linoleico	2.11	0.01055	0.211		C18:2n6c	A. Linoleico	1.89	0.00945	0.189		C18:2n6c	A. Linoleico	1.51	0.03775	0.755
					C18:3n3	A. α-Linolenico	4.37	0.02185	0.437		C18:3n3	A. α-Linolenico	5.62	0.0281	0.562		C18:3n3	A. α-Linolenico	1.28	0.032	0.64
					C18:3n6	A. caléndico	0.84	0.0042	0.084		C18:3n6	A. caléndico	1.29	0.00645	0.129		C18:3n6	A. caléndico	0.93	0.02325	0.465
					C20:0	A. Araquídico	0	0	0		C20:0	A. Araquídico	2.2	0.011	0.22		C20:0	A. Araquídico	0	0	0
					C20:1	A. Gadoleico	34.04	0.1702	3.404		C20:1	A. Gadoleico	34.8	0.174	3.48		C20:1	A. Gadoleico	44.12	1.103	22.06
					C20:2	A. Eicosadienoico	2.28	0.0114	0.228		C20:2	A. Eicosadienoico	2.01	0.01005	0.201		C20:2	A. Eicosadienoico	1.92	0.048	0.96
					C20:3n6	A. Dihomo-gamma-linolenico	0	0	0		C20:3n6	A. Dihomo-gamma-linolenico	0	0	0		C20:3n6	A. Dihomo-gamma-linolenico	0	0	0
					C20:3n3	A. eicosatrienoico	24.62	0.1231	2.462		C20:3n3	A. eicosatrienoico	9.09	0.04545	0.909		C20:3n3	A. eicosatrienoico	4.05	0.10125	2.025
					C20:4n6	A. araquidonico	1.82	0.0091	0.182		C20:4n6	A. araquidonico	0	0	0		C20:4n6	A. araquidonico	0	0	0
					C20:5n3	A. Eicosapentaenoico	39.19	0.19595	3.919		C20:5n3	A. Eicosapentaenoico	23.21	0.11605	2.321		C20:5n3	A. Eicosapentaenoico	2.6	0.065	1.3
					C21:0	A. heneicosanoico	1.82	0.0091	0.182		C21:0	A. heneicosanoico	0	0	0		C21:0	A. heneicosanoico	0	0	0
					C22:0	A. Behenoico	0	0	0		C22:0	A. Behenoico	0	0	0		C22:0	A. Behenoico	0	0	0
					C22:1n9	A. Erúcico	3.65	0.01825	0.365		C22:1n9	A. Erúcico	7.95	0.03975	0.795		C22:1n9	A. Erúcico	4.54	0.1135	2.27
					C23:0	A. Tricosílico	18.04	0.0902	1.804		C23:0	A. Tricosílico	6.46	0.0323	0.646		C23:0	A. Tricosílico	11.26	0.2815	5.63
					C22:6n3	DHA	292.65	1.46325	29.265		C22:6n3	DHA	126.02	0.6301	12.602		C22:6n3	DHA	34.54	0.8635	17.27
					C24:0	A. Lignocérico	2.62	0.0131	0.262		C24:0	A. Lignocérico	0	0	0		C24:0	A. Lignocérico	0	0	0
					C24:1	A. nervonico	0	0	0		C24:1	A. nervonico	9.66	0.0483	0.966		C24:1	A. nervonico	0	0	0
							Sum	4.8727					Sum	4.34505					Sum	13.0288
							84
					FA	Name	Concentration (mg/L)	Concentration (mg)	FA (mg*g DW)
					C6:0	Á. Caproico	0	0	0
					C8:0	A. Caprílico	0	0	0
					C10:0	A. Cáprico	0	0	0
					C11:0	A. Undecílico	0	0	0
					C12:0	A. Laurico	0	0	0
					C13:0	A. Tridecílico	0	0	0
					C14:0	A. Merístico	1.02	0.0051	0.102
					C14:1	A. Miristoleico	1.27	0.00635	0.127
					C15:0	A. Pentadecílico	0	0	0
					C15:1	A. Pentadecenoico	0	0	0
					C16:0	A. Palmítico	11.43	0.05715	1.143
					C16:1	A. Palmitoleico	1.89	0.00945	0.189
					C17:0	A. Margárico	2.26	0.0113	0.226
					C17:1	A. Heptadecenoico	0	0	0
					C18:0	A. Estearico	5.03	0.02515	0.503
					C18:1n9	A. Oleico	32.92	0.1646	3.292
					C18:2n6t	A. Linoelaidico	0	0	0
					C18:2n6c	A. Linoleico	0	0	0
					C18:3n3	A. α-Linolenico	0	0	0
					C18:3n6	A. caléndico	0	0	0
					C20:0	A. Araquídico	0	0	0
					C20:1	A. Gadoleico	4.45	0.02225	0.445
					C20:2	A. Eicosadienoico	0	0	0
					C20:3n6	A. Dihomo-gamma-linolenico	0	0	0
					C20:3n3	A. eicosatrienoico	3.78	0.0189	0.378
					C20:4n6	A. araquidonico	0	0	0
					C20:5n3	A. Eicosapentaenoico	6.95	0.03475	0.695
					C21:0	A. heneicosanoico	0	0	0
					C22:0	A. Behenoico	0	0	0
					C22:1n9	A. Erúcico	0	0	0
					C23:0	A. Tricosílico	6.4	0.032	0.64
					C22:6n3	DHA	81.27	0.40635	8.127
					C24:0	A. Lignocérico	0	0	0
					C24:1	A. nervonico	0	0	0
							Sum	0.79335
							119
					FA	Name	Concentration (mg/L)	Concentration (mg)	FA (mg*g DW)
					C6:0	Á. Caproico	0	0	0
					C8:0	A. Caprílico	0	0	0
					C10:0	A. Cáprico	0	0	0
					C11:0	A. Undecílico	0	0	0
					C12:0	A. Laurico	0	0	0
					C13:0	A. Tridecílico	0	0	0
					C14:0	A. Merístico	5.65	0.02825	0.565
					C14:1	A. Miristoleico	0	0	0
					C15:0	A. Pentadecílico	1.95	0.00975	0.195
					C15:1	A. Pentadecenoico	0	0	0
					C16:0	A. Palmítico	37.23	0.18615	3.723
					C16:1	A. Palmitoleico	6.08	0.0304	0.608
					C17:0	A. Margárico	1.79	0.00895	0.179
					C17:1	A. Heptadecenoico	0	0	0
					C18:0	A. Estearico	18.09	0.09045	1.809
					C18:1n9	A. Oleico	54.2	0.271	5.42
					C18:2n6t	A. Linoelaidico	0.93	0.00465	0.093
					C18:2n6c	A. Linoleico	0	0	0
					C18:3n3	A. α-Linolenico	0	0	0
					C18:3n6	A. caléndico	0	0	0
					C20:0	A. Araquídico	0	0	0
					C20:1	A. Gadoleico	5.51	0.02755	0.551
					C20:2	A. Eicosadienoico	0	0	0
					C20:3n6	A. Dihomo-gamma-linolenico	0	0	0
					C20:3n3	A. eicosatrienoico	1.81	0.00905	0.181
					C20:4n6	A. araquidonico	0	0	0
					C20:5n3	A. Eicosapentaenoico	2.9	0.0145	0.29
					C21:0	A. heneicosanoico	0	0	0
					C22:0	A. Behenoico	0	0	0
					C22:1n9	A. Erúcico	0	0	0
					C23:0	A. Tricosílico	0	0	0
					C22:6n3	DHA	12.5	0.0625	1.25
					C24:0	A. Lignocérico	0	0	0
					C24:1	A. nervonico	1.87	0.00935	0.187
							Sum	0.7432
							47
					FA	Name	Concentration (mg/L)	Concentration (mg)	FA (mg*g DW)
					C6:0	Á. Caproico	0	0	0
					C8:0	A. Caprílico	0	0	0
					C10:0	A. Cáprico	0	0	0
					C11:0	A. Undecílico	0	0	0
					C12:0	A. Laurico	0	0	0
					C13:0	A. Tridecílico	0	0	0
					C14:0	A. Merístico	0	0	0
					C14:1	A. Miristoleico	0	0	0
					C15:0	A. Pentadecílico	0	0	0
					C15:1	A. Pentadecenoico	0	0	0
					C16:0	A. Palmítico	4.07	0.02035	0.407
					C16:1	A. Palmitoleico	0	0	0
					C17:0	A. Margárico	0	0	0
					C17:1	A. Heptadecenoico	0	0	0
					C18:0	A. Estearico	2.35	0.01175	0.235
					C18:1n9	A. Oleico	5.37	0.02685	0.537
					C18:2n6t	A. Linoelaidico	0	0	0
					C18:2n6c	A. Linoleico	0	0	0
					C18:3n3	A. α-Linolenico	0	0	0
					C18:3n6	A. caléndico	0	0	0
					C20:0	A. Araquídico	0	0	0
					C20:1	A. Gadoleico	0	0	0
					C20:2	A. Eicosadienoico	0	0	0
					C20:3n6	A. Dihomo-gamma-linolenico	0	0	0
					C20:3n3	A. eicosatrienoico	0	0	0
					C20:4n6	A. araquidonico	0	0	0
					C20:5n3	A. Eicosapentaenoico	0	0	0
					C21:0	A. heneicosanoico	0	0	0
					C22:0	A. Behenoico	0	0	0
					C22:1n9	A. Erúcico	0	0	0
					C23:0	A. Tricosílico	0	0	0
					C22:6n3	DHA	6.89	0.03445	0.689
					C24:0	A. Lignocérico	0	0	0
					C24:1	A. nervonico	0	0	0
							Sum	0.0934
							586
					FA	Name	Concentration (mg/L)	Concentration (mg)	FA (mg*g DW)
					C6:0	Á. Caproico	0	0	0
					C8:0	A. Caprílico	0	0	0
					C10:0	A. Cáprico	0	0	0
					C11:0	A. Undecílico	0	0	0
					C12:0	A. Laurico	0	0	0
					C13:0	A. Tridecílico	0	0	0
					C14:0	A. Merístico	0	0	0
					C14:1	A. Miristoleico	0	0	0
					C15:0	A. Pentadecílico	0	0	0
					C15:1	A. Pentadecenoico	0	0	0
					C16:0	A. Palmítico	3.02	0.0151	0.302
					C16:1	A. Palmitoleico	1.47	0.00735	0.147
					C17:0	A. Margárico	0	0	0
					C17:1	A. Heptadecenoico	0	0	0
					C18:0	A. Estearico	1.88	0.0094	0.188
					C18:1n9	A. Oleico	1.32	0.0066	0.132
					C18:2n6t	A. Linoelaidico	0	0	0
					C18:2n6c	A. Linoleico	0	0	0
					C18:3n3	A. α-Linolenico	0	0	0
					C18:3n6	A. caléndico	0	0	0
					C20:0	A. Araquídico	0	0	0
					C20:1	A. Gadoleico	0	0	0
					C20:2	A. Eicosadienoico	0	0	0
					C20:3n6	A. Dihomo-gamma-linolenico	0	0	0
					C20:3n3	A. eicosatrienoico	0	0	0
					C20:4n6	A. araquidonico	0	0	0
					C20:5n3	A. Eicosapentaenoico	0	0	0
					C21:0	A. heneicosanoico	0	0	0
					C22:0	A. Behenoico	0	0	0
					C22:1n9	A. Erúcico	0	0	0
					C23:0	A. Tricosílico	0	0	0
					C22:6n3	DHA	2.65	0.01325	0.265
					C24:0	A. Lignocérico	0	0	0
					C24:1	A. nervonico	0	0	0
							Sum	0.0517
							63
					FA	Name	Concentration (mg/L)	Concentration (mg)	FA (mg*g DW)
					C6:0	Á. Caproico	0	0	0
					C8:0	A. Caprílico	0	0	0
					C10:0	A. Cáprico	0	0	0
					C11:0	A. Undecílico	0	0	0
					C12:0	A. Laurico	0	0	0
					C13:0	A. Tridecílico	0	0	0
					C14:0	A. Merístico	7.05	0.03525	0.705
					C14:1	A. Miristoleico	0.69	0.00345	0.069
					C15:0	A. Pentadecílico	2.22	0.0111	0.222
					C15:1	A. Pentadecenoico	0	0	0
					C16:0	A. Palmítico	89.55	0.44775	8.955
					C16:1	A. Palmitoleico	18.31	0.09155	1.831
					C17:0	A. Margárico	4.66	0.0233	0.466
					C17:1	A. Heptadecenoico	3.74	0.0187	0.374
					C18:0	A. Estearico	41.05	0.20525	4.105
					C18:1n9	A. Oleico	192.07	0.96035	19.207
					C18:2n6t	A. Linoelaidico	4.18	0.0209	0.418
					C18:2n6c	A. Linoleico	1.61	0.00805	0.161
					C18:3n3	A. α-Linolenico	3.01	0.01505	0.301
					C18:3n6	A. caléndico	0	0	0
					C20:0	A. Araquídico	0	0	0
					C20:1	A. Gadoleico	33.78	0.1689	3.378
					C20:2	A. Eicosadienoico	1.8	0.009	0.18
					C20:3n6	A. Dihomo-gamma-linolenico	0	0	0
					C20:3n3	A. eicosatrienoico	15.78	0.0789	1.578
					C20:4n6	A. araquidonico	0	0	0
					C20:5n3	A. Eicosapentaenoico	24.01	0.12005	2.401
					C21:0	A. heneicosanoico	0	0	0
					C22:0	A. Behenoico	0	0	0
					C22:1n9	A. Erúcico	3.64	0.0182	0.364
					C23:0	A. Tricosílico	13.99	0.06995	1.399
					C22:6n3	DHA	255.16	1.2758	25.516
					C24:0	A. Lignocérico	0	0	0
					C24:1	A. nervonico	2	0.01	0.2
							Sum	3.5815
							897
					FA	Name	Concentration (mg/L)	Concentration (mg)	FA (mg*g DW)
					C6:0	Á. Caproico	0	0	0
					C8:0	A. Caprílico	0	0	0
					C10:0	A. Cáprico	0	0	0
					C11:0	A. Undecílico	0	0	0
					C12:0	A. Laurico	0	0	0
					C13:0	A. Tridecílico	0	0	0
					C14:0	A. Merístico	0	0	0
					C14:1	A. Miristoleico	0	0	0
					C15:0	A. Pentadecílico	0	0	0
					C15:1	A. Pentadecenoico	0	0	0
					C16:0	A. Palmítico	2.1	0.0105	0.21
					C16:1	A. Palmitoleico	0	0	0
					C17:0	A. Margárico	0	0	0
					C17:1	A. Heptadecenoico	0	0	0
					C18:0	A. Estearico	1.55	0.00775	0.155
					C18:1n9	A. Oleico	0	0	0
					C18:2n6t	A. Linoelaidico	0	0	0
					C18:2n6c	A. Linoleico	0	0	0
					C18:3n3	A. α-Linolenico	0	0	0
					C18:3n6	A. caléndico	0	0	0
					C20:0	A. Araquídico	0	0	0
					C20:1	A. Gadoleico	0	0	0
					C20:2	A. Eicosadienoico	0	0	0
					C20:3n6	A. Dihomo-gamma-linolenico	0	0	0
					C20:3n3	A. eicosatrienoico	0	0	0
					C20:4n6	A. araquidonico	0	0	0
					C20:5n3	A. Eicosapentaenoico	0	0	0
					C21:0	A. heneicosanoico	0	0	0
					C22:0	A. Behenoico	0	0	0
					C22:1n9	A. Erúcico	0	0	0
					C23:0	A. Tricosílico	0	0	0
					C22:6n3	DHA	0	0	0
					C24:0	A. Lignocérico	0	0	0
					C24:1	A. nervonico	0	0	0
							Sum	0.01825
							66
					FA	Name	Concentration (mg/L)	Concentration (mg)	FA (mg*g DW)
					C6:0	Á. Caproico	0	0	0
					C8:0	A. Caprílico	0	0	0
					C10:0	A. Cáprico	0	0	0
					C11:0	A. Undecílico	0	0	0
					C12:0	A. Laurico	0	0	0
					C13:0	A. Tridecílico	0	0	0
					C14:0	A. Merístico	0	0	0
					C14:1	A. Miristoleico	0	0	0
					C15:0	A. Pentadecílico	0	0	0
					C15:1	A. Pentadecenoico	0	0	0
					C16:0	A. Palmítico	9.44	0.0472	0.944
					C16:1	A. Palmitoleico	1.48	0.0074	0.148
					C17:0	A. Margárico	0	0	0
					C17:1	A. Heptadecenoico	0	0	0
					C18:0	A. Estearico	5.12	0.0256	0.512
					C18:1n9	A. Oleico	8.53	0.04265	0.853
					C18:2n6t	A. Linoelaidico	0	0	0
					C18:2n6c	A. Linoleico	0	0	0
					C18:3n3	A. α-Linolenico	0	0	0
					C18:3n6	A. caléndico	0	0	0
					C20:0	A. Araquídico	0	0	0
					C20:1	A. Gadoleico	0	0	0
					C20:2	A. Eicosadienoico	0	0	0
					C20:3n6	A. Dihomo-gamma-linolenico	0	0	0
					C20:3n3	A. eicosatrienoico	1.68	0.0084	0.168
					C20:4n6	A. araquidonico	0	0	0
					C20:5n3	A. Eicosapentaenoico	0	0	0
					C21:0	A. heneicosanoico	0	0	0
					C22:0	A. Behenoico	0	0	0
					C22:1n9	A. Erúcico	0	0	0
					C23:0	A. Tricosílico	0	0	0
					C22:6n3	DHA	11.8	0.059	1.18
					C24:0	A. Lignocérico	0	0	0
					C24:1	A. nervonico	0	0	0
							Sum	0.19025
							587
					FA	Name	Concentration (mg/L)	Concentration (mg)	FA (mg*g DW)
					C6:0	Á. Caproico	0	0	0
					C8:0	A. Caprílico	0	0	0
					C10:0	A. Cáprico	0	0	0
					C11:0	A. Undecílico	0	0	0
					C12:0	A. Laurico	0	0	0
					C13:0	A. Tridecílico	0	0	0
					C14:0	A. Merístico	0	0	0
					C14:1	A. Miristoleico	0	0	0
					C15:0	A. Pentadecílico	0	0	0
					C15:1	A. Pentadecenoico	0	0	0
					C16:0	A. Palmítico	3.24	0.0162	0.324
					C16:1	A. Palmitoleico	0	0	0
					C17:0	A. Margárico	0	0	0
					C17:1	A. Heptadecenoico	0	0	0
					C18:0	A. Estearico	2.25	0.01125	0.225
					C18:1n9	A. Oleico	1.55	0.00775	0.155
					C18:2n6t	A. Linoelaidico	0	0	0
					C18:2n6c	A. Linoleico	0	0	0
					C18:3n3	A. α-Linolenico	0	0	0
					C18:3n6	A. caléndico	0	0	0
					C20:0	A. Araquídico	0	0	0
					C20:1	A. Gadoleico	0	0	0
					C20:2	A. Eicosadienoico	0	0	0
					C20:3n6	A. Dihomo-gamma-linolenico	0	0	0
					C20:3n3	A. eicosatrienoico	0	0	0
					C20:4n6	A. araquidonico	0	0	0
					C20:5n3	A. Eicosapentaenoico	0	0	0
					C21:0	A. heneicosanoico	0	0	0
					C22:0	A. Behenoico	0	0	0
					C22:1n9	A. Erúcico	0	0	0
					C23:0	A. Tricosílico	0	0	0
					C22:6n3	DHA	0	0	0
					C24:0	A. Lignocérico	0	0	0
					C24:1	A. nervonico	0	0	0
							Sum	0.0352
							558
					FA	Name	Concentration (mg/L)	Concentration (mg)	FA (mg*g DW)
					C6:0	Á. Caproico	0	0	0
					C8:0	A. Caprílico	0	0	0
					C10:0	A. Cáprico	0	0	0
					C11:0	A. Undecílico	0	0	0
					C12:0	A. Laurico	0	0	0
					C13:0	A. Tridecílico	0	0	0
					C14:0	A. Merístico	0.96	0.0048	0.096
					C14:1	A. Miristoleico	0	0	0
					C15:0	A. Pentadecílico	0	0	0
					C15:1	A. Pentadecenoico	0	0	0
					C16:0	A. Palmítico	11.86	0.0593	1.186
					C16:1	A. Palmitoleico	3.5	0.0175	0.35
					C17:0	A. Margárico	0	0	0
					C17:1	A. Heptadecenoico	0	0	0
					C18:0	A. Estearico	6.46	0.0323	0.646
					C18:1n9	A. Oleico	7.13	0.03565	0.713
					C18:2n6t	A. Linoelaidico	0	0	0
					C18:2n6c	A. Linoleico	0	0	0
					C18:3n3	A. α-Linolenico	0	0	0
					C18:3n6	A. caléndico	0	0	0
					C20:0	A. Araquídico	0	0	0
					C20:1	A. Gadoleico	0	0	0
					C20:2	A. Eicosadienoico	0	0	0
					C20:3n6	A. Dihomo-gamma-linolenico	0	0	0
					C20:3n3	A. eicosatrienoico	2.81	0.01405	0.281
					C20:4n6	A. araquidonico	0	0	0
					C20:5n3	A. Eicosapentaenoico	0	0	0
					C21:0	A. heneicosanoico	0	0	0
					C22:0	A. Behenoico	0	0	0
					C22:1n9	A. Erúcico	0	0	0
					C23:0	A. Tricosílico	0	0	0
					C22:6n3	DHA	9.77	0.04885	0.977
					C24:0	A. Lignocérico	0	0	0
					C24:1	A. nervonico	0	0	0
							Sum	0.21245
							341
					FA	Name	Concentration (mg/L)	Concentration (mg)	FA (mg*g DW)
					C6:0	Á. Caproico	0	0	0
					C8:0	A. Caprílico	0	0	0
					C10:0	A. Cáprico	0	0	0
					C11:0	A. Undecílico	0	0	0
					C12:0	A. Laurico	0	0	0
					C13:0	A. Tridecílico	0	0	0
					C14:0	A. Merístico	0	0	0
					C14:1	A. Miristoleico	0	0	0
					C15:0	A. Pentadecílico	0	0	0
					C15:1	A. Pentadecenoico	0	0	0
					C16:0	A. Palmítico	3.16	0.0158	0.316
					C16:1	A. Palmitoleico	0	0	0
					C17:0	A. Margárico	0	0	0
					C17:1	A. Heptadecenoico	0	0	0
					C18:0	A. Estearico	1.77	0.00885	0.177
					C18:1n9	A. Oleico	2.8	0.014	0.28
					C18:2n6t	A. Linoelaidico	0	0	0
					C18:2n6c	A. Linoleico	0	0	0
					C18:3n3	A. α-Linolenico	0	0	0
					C18:3n6	A. caléndico	0	0	0
					C20:0	A. Araquídico	0	0	0
					C20:1	A. Gadoleico	0	0	0
					C20:2	A. Eicosadienoico	0	0	0
					C20:3n6	A. Dihomo-gamma-linolenico	0	0	0
					C20:3n3	A. eicosatrienoico	0	0	0
					C20:4n6	A. araquidonico	0	0	0
					C20:5n3	A. Eicosapentaenoico	0	0	0
					C21:0	A. heneicosanoico	0	0	0
					C22:0	A. Behenoico	0	0	0
					C22:1n9	A. Erúcico	0	0	0
					C23:0	A. Tricosílico	0	0	0
					C22:6n3	DHA	0	0	0
					C24:0	A. Lignocérico	0	0	0
					C24:1	A. nervonico	0	0	0
							Sum	0.03865
							111
					FA	Name	Concentration (mg/L)	Concentration (mg)	FA (mg*g DW)
					C6:0	Á. Caproico	0	0	0
					C8:0	A. Caprílico	0	0	0
					C10:0	A. Cáprico	0	0	0
					C11:0	A. Undecílico	0	0	0
					C12:0	A. Laurico	0	0	0
					C13:0	A. Tridecílico	0	0	0
					C14:0	A. Merístico	8.34	0.0417	0.834
					C14:1	A. Miristoleico	0	0	0
					C15:0	A. Pentadecílico	2.11	0.01055	0.211
					C15:1	A. Pentadecenoico	0	0	0
					C16:0	A. Palmítico	92.63	0.46315	9.263
					C16:1	A. Palmitoleico	12.19	0.06095	1.219
					C17:0	A. Margárico	4.43	0.02215	0.443
					C17:1	A. Heptadecenoico	3.64	0.0182	0.364
					C18:0	A. Estearico	46.53	0.23265	4.653
					C18:1n9	A. Oleico	203.55	1.01775	20.355
					C18:2n6t	A. Linoelaidico	2.02	0.0101	0.202
					C18:2n6c	A. Linoleico	0	0	0
					C18:3n3	A. α-Linolenico	0.96	0.0048	0.096
					C18:3n6	A. caléndico	0	0	0
					C20:0	A. Araquídico	0	0	0
					C20:1	A. Gadoleico	38.14	0.1907	3.814
					C20:2	A. Eicosadienoico	0	0	0
					C20:3n6	A. Dihomo-gamma-linolenico	0	0	0
					C20:3n3	A. eicosatrienoico	7.05	0.03525	0.705
					C20:4n6	A. araquidonico	0	0	0
					C20:5n3	A. Eicosapentaenoico	13.6	0.068	1.36
					C21:0	A. heneicosanoico	0	0	0
					C22:0	A. Behenoico	0	0	0
					C22:1n9	A. Erúcico	5.55	0.02775	0.555
					C23:0	A. Tricosílico	7.62	0.0381	0.762
					C22:6n3	DHA	114.65	0.57325	11.465
					C24:0	A. Lignocérico	0	0	0
					C24:1	A. nervonico	3.45	0.01725	0.345
							Sum	2.81505
							75
					FA	Name	Concentration (mg/L)	Concentration (mg)	FA (mg*g DW)
					C6:0	Á. Caproico	0	0	0
					C8:0	A. Caprílico	0	0	0
					C10:0	A. Cáprico	0	0	0
					C11:0	A. Undecílico	0	0	0
					C12:0	A. Laurico	0	0	0
					C13:0	A. Tridecílico	0	0	0
					C14:0	A. Merístico	0	0	0
					C14:1	A. Miristoleico	0	0	0
					C15:0	A. Pentadecílico	0	0	0
					C15:1	A. Pentadecenoico	0	0	0
					C16:0	A. Palmítico	3.25	0.01625	0.325
					C16:1	A. Palmitoleico	1.06	0.0053	0.106
					C17:0	A. Margárico	0	0	0
					C17:1	A. Heptadecenoico	0	0	0
					C18:0	A. Estearico	2.18	0.0109	0.218
					C18:1n9	A. Oleico	1.24	0.0062	0.124
					C18:2n6t	A. Linoelaidico	0	0	0
					C18:2n6c	A. Linoleico	0	0	0
					C18:3n3	A. α-Linolenico	0	0	0
					C18:3n6	A. caléndico	0	0	0
					C20:0	A. Araquídico	0	0	0
					C20:1	A. Gadoleico	0	0	0
					C20:2	A. Eicosadienoico	0	0	0
					C20:3n6	A. Dihomo-gamma-linolenico	0	0	0
					C20:3n3	A. eicosatrienoico	0	0	0
					C20:4n6	A. araquidonico	0	0	0
					C20:5n3	A. Eicosapentaenoico	0	0	0
					C21:0	A. heneicosanoico	0	0	0
					C22:0	A. Behenoico	0	0	0
					C22:1n9	A. Erúcico	0	0	0
					C23:0	A. Tricosílico	0	0	0
					C22:6n3	DHA	2.63	0.01315	0.263
					C24:0	A. Lignocérico	0	0	0
					C24:1	A. nervonico	0	0	0
							Sum	0.0518
							28
					FA	Name	Concentration (mg/L)	Concentration (mg)	FA (mg*g DW)
					C6:0	Á. Caproico	0	0	0
					C8:0	A. Caprílico	0	0	0
					C10:0	A. Cáprico	0	0	0
					C11:0	A. Undecílico	0	0	0
					C12:0	A. Laurico	0	0	0
					C13:0	A. Tridecílico	0	0	0
					C14:0	A. Merístico	1.09	0.00545	0.109
					C14:1	A. Miristoleico	0	0	0
					C15:0	A. Pentadecílico	0	0	0
					C15:1	A. Pentadecenoico	0	0	0
					C16:0	A. Palmítico	25.64	0.1282	2.564
					C16:1	A. Palmitoleico	3.78	0.0189	0.378
					C17:0	A. Margárico	1.16	0.0058	0.116
					C17:1	A. Heptadecenoico	0	0	0
					C18:0	A. Estearico	9.8	0.049	0.98
					C18:1n9	A. Oleico	38.73	0.19365	3.873
					C18:2n6t	A. Linoelaidico	0	0	0
					C18:2n6c	A. Linoleico	0	0	0
					C18:3n3	A. α-Linolenico	0	0	0
					C18:3n6	A. caléndico	0	0	0
					C20:0	A. Araquídico	0	0	0
					C20:1	A. Gadoleico	5.18	0.0259	0.518
					C20:2	A. Eicosadienoico	0	0	0
					C20:3n6	A. Dihomo-gamma-linolenico	0	0	0
					C20:3n3	A. eicosatrienoico	6.79	0.03395	0.679
					C20:4n6	A. araquidonico	0	0	0
					C20:5n3	A. Eicosapentaenoico	8.81	0.04405	0.881
					C21:0	A. heneicosanoico	0	0	0
					C22:0	A. Behenoico	0	0	0
					C22:1n9	A. Erúcico	0	0	0
					C23:0	A. Tricosílico	5.12	0.0256	0.512
					C22:6n3	DHA	70.18	0.3509	7.018
					C24:0	A. Lignocérico	0	0	0
					C24:1	A. nervonico	0	0	0
							Sum	0.8814
							343
					FA	Name	Concentration (mg/L)	Concentration (mg)	FA (mg*g DW)
					C6:0	Á. Caproico	0	0	0
					C8:0	A. Caprílico	0	0	0
					C10:0	A. Cáprico	0	0	0
					C11:0	A. Undecílico	0	0	0
					C12:0	A. Laurico	0	0	0
					C13:0	A. Tridecílico	0	0	0
					C14:0	A. Merístico	0	0	0
					C14:1	A. Miristoleico	0	0	0
					C15:0	A. Pentadecílico	0	0	0
					C15:1	A. Pentadecenoico	0	0	0
					C16:0	A. Palmítico	2.32	0.0116	0.232
					C16:1	A. Palmitoleico	0	0	0
					C17:0	A. Margárico	0	0	0
					C17:1	A. Heptadecenoico	0	0	0
					C18:0	A. Estearico	1.62	0.0081	0.162
					C18:1n9	A. Oleico	0	0	0
					C18:2n6t	A. Linoelaidico	0	0	0
					C18:2n6c	A. Linoleico	0	0	0
					C18:3n3	A. α-Linolenico	0	0	0
					C18:3n6	A. caléndico	0	0	0
					C20:0	A. Araquídico	0	0	0
					C20:1	A. Gadoleico	0	0	0
					C20:2	A. Eicosadienoico	0	0	0
					C20:3n6	A. Dihomo-gamma-linolenico	0	0	0
					C20:3n3	A. eicosatrienoico	0	0	0
					C20:4n6	A. araquidonico	0	0	0
					C20:5n3	A. Eicosapentaenoico	0	0	0
					C21:0	A. heneicosanoico	0	0	0
					C22:0	A. Behenoico	0	0	0
					C22:1n9	A. Erúcico	0	0	0
					C23:0	A. Tricosílico	0	0	0
					C22:6n3	DHA	0	0	0
					C24:0	A. Lignocérico	0	0	0
					C24:1	A. nervonico	0	0	0
							Sum	0.0197
							630
					FA	Name	Concentration (mg/L)	Concentration (mg)	FA (mg*g DW)
					C6:0	Á. Caproico	0	0	0
					C8:0	A. Caprílico	0	0	0
					C10:0	A. Cáprico	0	0	0
					C11:0	A. Undecílico	0	0	0
					C12:0	A. Laurico	0	0	0
					C13:0	A. Tridecílico	0	0	0
					C14:0	A. Merístico	1.24	0.0062	0.124
					C14:1	A. Miristoleico	0	0	0
					C15:0	A. Pentadecílico	0	0	0
					C15:1	A. Pentadecenoico	0	0	0
					C16:0	A. Palmítico	12.11	0.06055	1.211
					C16:1	A. Palmitoleico	2.57	0.01285	0.257
					C17:0	A. Margárico	0	0	0
					C17:1	A. Heptadecenoico	0	0	0
					C18:0	A. Estearico	5.24	0.0262	0.524
					C18:1n9	A. Oleico	16.55	0.08275	1.655
					C18:2n6t	A. Linoelaidico	0	0	0
					C18:2n6c	A. Linoleico	0	0	0
					C18:3n3	A. α-Linolenico	0	0	0
					C18:3n6	A. caléndico	0	0	0
					C20:0	A. Araquídico	0	0	0
					C20:1	A. Gadoleico	1.9	0.0095	0.19
					C20:2	A. Eicosadienoico	0	0	0
					C20:3n6	A. Dihomo-gamma-linolenico	0	0	0
					C20:3n3	A. eicosatrienoico	1.83	0.00915	0.183
					C20:4n6	A. araquidonico	0	0	0
					C20:5n3	A. Eicosapentaenoico	2.86	0.0143	0.286
					C21:0	A. heneicosanoico	0	0	0
					C22:0	A. Behenoico	0	0	0
					C22:1n9	A. Erúcico	0	0	0
					C23:0	A. Tricosílico	0	0	0
					C22:6n3	DHA	23.5	0.1175	2.35
					C24:0	A. Lignocérico	0	0	0
					C24:1	A. nervonico	0	0	0
							Sum	0.339
							2
					FA	Name	Concentration (mg/L)	Concentration (mg)	FA (mg*g DW)
					C6:0	Á. Caproico	0	0	0
					C8:0	A. Caprílico	0	0	0
					C10:0	A. Cáprico	0	0	0
					C11:0	A. Undecílico	0	0	0
					C12:0	A. Laurico	0	0	0
					C13:0	A. Tridecílico	0	0	0
					C14:0	A. Merístico	1.38	0.0069	0.138
					C14:1	A. Miristoleico	0	0	0
					C15:0	A. Pentadecílico	0	0	0
					C15:1	A. Pentadecenoico	0	0	0
					C16:0	A. Palmítico	12.55	0.06275	1.255
					C16:1	A. Palmitoleico	2.45	0.01225	0.245
					C17:0	A. Margárico	0	0	0
					C17:1	A. Heptadecenoico	0	0	0
					C18:0	A. Estearico	7.01	0.03505	0.701
					C18:1n9	A. Oleico	13.67	0.06835	1.367
					C18:2n6t	A. Linoelaidico	0	0	0
					C18:2n6c	A. Linoleico	0	0	0
					C18:3n3	A. α-Linolenico	0	0	0
					C18:3n6	A. caléndico	0	0	0
					C20:0	A. Araquídico	0	0	0
					C20:1	A. Gadoleico	1.87	0.00935	0.187
					C20:2	A. Eicosadienoico	0	0	0
					C20:3n6	A. Dihomo-gamma-linolenico	0	0	0
					C20:3n3	A. eicosatrienoico	3.63	0.01815	0.363
					C20:4n6	A. araquidonico	0	0	0
					C20:5n3	A. Eicosapentaenoico	0	0	0
					C21:0	A. heneicosanoico	0	0	0
					C22:0	A. Behenoico	0	0	0
					C22:1n9	A. Erúcico	0	0	0
					C23:0	A. Tricosílico	0	0	0
					C22:6n3	DHA	11.97	0.05985	1.197
					C24:0	A. Lignocérico	0	0	0
					C24:1	A. nervonico	0	0	0
							Sum	0.27265
							644
					FA	Name	Concentration (mg/L)	Concentration (mg)	FA (mg*g DW)
					C6:0	Á. Caproico	0	0	0
					C8:0	A. Caprílico	0	0	0
					C10:0	A. Cáprico	0	0	0
					C11:0	A. Undecílico	0	0	0
					C12:0	A. Laurico	0	0	0
					C13:0	A. Tridecílico	0	0	0
					C14:0	A. Merístico	0.91	0.00455	0.091
					C14:1	A. Miristoleico	0	0	0
					C15:0	A. Pentadecílico	0	0	0
					C15:1	A. Pentadecenoico	0	0	0
					C16:0	A. Palmítico	9.22	0.0461	0.922
					C16:1	A. Palmitoleico	2.01	0.01005	0.201
					C17:0	A. Margárico	0	0	0
					C17:1	A. Heptadecenoico	0	0	0
					C18:0	A. Estearico	4.31	0.02155	0.431
					C18:1n9	A. Oleico	20.99	0.10495	2.099
					C18:2n6t	A. Linoelaidico	0	0	0
					C18:2n6c	A. Linoleico	0	0	0
					C18:3n3	A. α-Linolenico	0	0	0
					C18:3n6	A. caléndico	0	0	0
					C20:0	A. Araquídico	0	0	0
					C20:1	A. Gadoleico	4.33	0.02165	0.433
					C20:2	A. Eicosadienoico	0	0	0
					C20:3n6	A. Dihomo-gamma-linolenico	0	0	0
					C20:3n3	A. eicosatrienoico	1.38	0.0069	0.138
					C20:4n6	A. araquidonico	0	0	0
					C20:5n3	A. Eicosapentaenoico	2.33	0.01165	0.233
					C21:0	A. heneicosanoico	0	0	0
					C22:0	A. Behenoico	0	0	0
					C22:1n9	A. Erúcico	0	0	0
					C23:0	A. Tricosílico	3.42	0.0171	0.342
					C22:6n3	DHA	27.55	0.13775	2.755
					C24:0	A. Lignocérico	0	0	0
					C24:1	A. nervonico	0	0	0
							Sum	0.38225
							80
					FA	Name	Concentration (mg/L)	Concentration (mg)	FA (mg*g DW)
					C6:0	Á. Caproico	0	0	0
					C8:0	A. Caprílico	0	0	0
					C10:0	A. Cáprico	0	0	0
					C11:0	A. Undecílico	0	0	0
					C12:0	A. Laurico	0	0	0
					C13:0	A. Tridecílico	0	0	0
					C14:0	A. Merístico	0.81	0.00405	0.081
					C14:1	A. Miristoleico	0	0	0
					C15:0	A. Pentadecílico	0	0	0
					C15:1	A. Pentadecenoico	0	0	0
					C16:0	A. Palmítico	8.59	0.04295	0.859
					C16:1	A. Palmitoleico	2.02	0.0101	0.202
					C17:0	A. Margárico	0	0	0
					C17:1	A. Heptadecenoico	0	0	0
					C18:0	A. Estearico	3.98	0.0199	0.398
					C18:1n9	A. Oleico	15.78	0.0789	1.578
					C18:2n6t	A. Linoelaidico	0	0	0
					C18:2n6c	A. Linoleico	0	0	0
					C18:3n3	A. α-Linolenico	0	0	0
					C18:3n6	A. caléndico	0	0	0
					C20:0	A. Araquídico	0	0	0
					C20:1	A. Gadoleico	2.46	0.0123	0.246
					C20:2	A. Eicosadienoico	0	0	0
					C20:3n6	A. Dihomo-gamma-linolenico	0	0	0
					C20:3n3	A. eicosatrienoico	1.74	0	0
					C20:4n6	A. araquidonico	0	0	0
					C20:5n3	A. Eicosapentaenoico	1.84	0	0
					C21:0	A. heneicosanoico	0	0	0
					C22:0	A. Behenoico	0	0	0
					C22:1n9	A. Erúcico	0	0	0
					C23:0	A. Tricosílico	0	0	0
					C22:6n3	DHA	22.34	0.1117	2.234
					C24:0	A. Lignocérico	0	0	0
					C24:1	A. nervonico	0	0	0
							Sum	0.2799
							53
					FA	Name	Concentration (mg/L)	Concentration (mg)	FA (mg*g DW)
					C6:0	Á. Caproico	0	0	0
					C8:0	A. Caprílico	0	0	0
					C10:0	A. Cáprico	0	0	0
					C11:0	A. Undecílico	0	0	0
					C12:0	A. Laurico	0	0	0
					C13:0	A. Tridecílico	0	0	0
					C14:0	A. Merístico	0	0	0
					C14:1	A. Miristoleico	0	0	0
					C15:0	A. Pentadecílico	0	0	0
					C15:1	A. Pentadecenoico	0	0	0
					C16:0	A. Palmítico	8.42	0.0421	0.842
					C16:1	A. Palmitoleico	2.35	0.01175	0.235
					C17:0	A. Margárico	0	0	0
					C17:1	A. Heptadecenoico	0	0	0
					C18:0	A. Estearico	4.33	0.02165	0.433
					C18:1n9	A. Oleico	11.2	0.056	1.12
					C18:2n6t	A. Linoelaidico	0	0	0
					C18:2n6c	A. Linoleico	0	0	0
					C18:3n3	A. α-Linolenico	0	0	0
					C18:3n6	A. caléndico	0	0	0
					C20:0	A. Araquídico	0	0	0
					C20:1	A. Gadoleico	1.62	0.0081	0.162
					C20:2	A. Eicosadienoico	0	0	0
					C20:3n6	A. Dihomo-gamma-linolenico	0	0	0
					C20:3n3	A. eicosatrienoico	1.62	0.0081	0.162
					C20:4n6	A. araquidonico	0	0	0
					C20:5n3	A. Eicosapentaenoico	0	0	0
					C21:0	A. heneicosanoico	0	0	0
					C22:0	A. Behenoico	0	0	0
					C22:1n9	A. Erúcico	0	0	0
					C23:0	A. Tricosílico	0	0	0
					C22:6n3	DHA	16.76	0.0838	1.676
					C24:0	A. Lignocérico	0	0	0
					C24:1	A. nervonico	0	0	0
							Sum	0.2315
							720
					FA	Name	Concentration (mg/L)	Concentration (mg)	FA (mg*g DW)
					C6:0	Á. Caproico	0	0	0
					C8:0	A. Caprílico	0	0	0
					C10:0	A. Cáprico	0	0	0
					C11:0	A. Undecílico	0	0	0
					C12:0	A. Laurico	0	0	0
					C13:0	A. Tridecílico	0	0	0
					C14:0	A. Merístico	1.24	0.0062	0.124
					C14:1	A. Miristoleico	0	0	0
					C15:0	A. Pentadecílico	0	0	0
					C15:1	A. Pentadecenoico	0	0	0
					C16:0	A. Palmítico	19.6	0.098	1.96
					C16:1	A. Palmitoleico	2.75	0.01375	0.275
					C17:0	A. Margárico	1.2	0.006	0.12
					C17:1	A. Heptadecenoico	0	0	0
					C18:0	A. Estearico	9.59	0.04795	0.959
					C18:1n9	A. Oleico	25.24	0.1262	2.524
					C18:2n6t	A. Linoelaidico	0	0	0
					C18:2n6c	A. Linoleico	0	0	0
					C18:3n3	A. α-Linolenico	0	0	0
					C18:3n6	A. caléndico	0	0	0
					C20:0	A. Araquídico	0	0	0
					C20:1	A. Gadoleico	2.47	0.01235	0.247
					C20:2	A. Eicosadienoico	0	0	0
					C20:3n6	A. Dihomo-gamma-linolenico	0	0	0
					C20:3n3	A. eicosatrienoico	1.58	0.0079	0.158
					C20:4n6	A. araquidonico	0	0	0
					C20:5n3	A. Eicosapentaenoico	0	0	0
					C21:0	A. heneicosanoico	0	0	0
					C22:0	A. Behenoico	0	0	0
					C22:1n9	A. Erúcico	0	0	0
					C23:0	A. Tricosílico	0	0	0
					C22:6n3	DHA	14.9	0.0745	1.49
					C24:0	A. Lignocérico	0	0	0
					C24:1	A. nervonico	0	0	0
							Sum	0.39285
							264
					FA	Name	Concentration (mg/L)	Concentration (mg)	FA (mg*g DW)
					C6:0	Á. Caproico	0	0	0
					C8:0	A. Caprílico	0	0	0
					C10:0	A. Cáprico	0	0	0
					C11:0	A. Undecílico	0	0	0
					C12:0	A. Laurico	0	0	0
					C13:0	A. Tridecílico	0	0	0
					C14:0	A. Merístico	0	0	0
					C14:1	A. Miristoleico	0	0	0
					C15:0	A. Pentadecílico	0	0	0
					C15:1	A. Pentadecenoico	0	0	0
					C16:0	A. Palmítico	2.65	0.01325	0.265
					C16:1	A. Palmitoleico	0	0	0
					C17:0	A. Margárico	0	0	0
					C17:1	A. Heptadecenoico	0	0	0
					C18:0	A. Estearico	1.7	0.0085	0.17
					C18:1n9	A. Oleico	1.04	0.0052	0.104
					C18:2n6t	A. Linoelaidico	0	0	0
					C18:2n6c	A. Linoleico	0	0	0
					C18:3n3	A. α-Linolenico	0	0	0
					C18:3n6	A. caléndico	0	0	0
					C20:0	A. Araquídico	0	0	0
					C20:1	A. Gadoleico	0	0	0
					C20:2	A. Eicosadienoico	0	0	0
					C20:3n6	A. Dihomo-gamma-linolenico	0	0	0
					C20:3n3	A. eicosatrienoico	0	0	0
					C20:4n6	A. araquidonico	0	0	0
					C20:5n3	A. Eicosapentaenoico	0	0	0
					C21:0	A. heneicosanoico	0	0	0
					C22:0	A. Behenoico	0	0	0
					C22:1n9	A. Erúcico	0	0	0
					C23:0	A. Tricosílico	0	0	0
					C22:6n3	DHA	0	0	0
					C24:0	A. Lignocérico	0	0	0
					C24:1	A. nervonico	0	0	0
							Sum	0.02695
							130
					FA	Name	Concentration (mg/L)	Concentration (mg)	FA (mg*g DW)
					C6:0	Á. Caproico	0	0	0
					C8:0	A. Caprílico	0	0	0
					C10:0	A. Cáprico	0	0	0
					C11:0	A. Undecílico	0	0	0
					C12:0	A. Laurico	0	0	0
					C13:0	A. Tridecílico	0	0	0
					C14:0	A. Merístico	2.92	0.0146	0.292
					C14:1	A. Miristoleico	0	0	0
					C15:0	A. Pentadecílico	1.14	0.0057	0.114
					C15:1	A. Pentadecenoico	0	0	0
					C16:0	A. Palmítico	36.93	0.18465	3.693
					C16:1	A. Palmitoleico	5.83	0.02915	0.583
					C17:0	A. Margárico	1.87	0.00935	0.187
					C17:1	A. Heptadecenoico	1.23	0.00615	0.123
					C18:0	A. Estearico	15.19	0.07595	1.519
					C18:1n9	A. Oleico	62.18	0.3109	6.218
					C18:2n6t	A. Linoelaidico	0.66	0.0033	0.066
					C18:2n6c	A. Linoleico	0	0	0
					C18:3n3	A. α-Linolenico	0	0	0
					C18:3n6	A. caléndico	0	0	0
					C20:0	A. Araquídico	0	0	0
					C20:1	A. Gadoleico	11.37	0.05685	1.137
					C20:2	A. Eicosadienoico	0	0	0
					C20:3n6	A. Dihomo-gamma-linolenico	0	0	0
					C20:3n3	A. eicosatrienoico	5.65	0.02825	0.565
					C20:4n6	A. araquidonico	0	0	0
					C20:5n3	A. Eicosapentaenoico	7.51	0.03755	0.751
					C21:0	A. heneicosanoico	0	0	0
					C22:0	A. Behenoico	0	0	0
					C22:1n9	A. Erúcico	0	0	0
					C23:0	A. Tricosílico	3.74	0.0187	0.374
					C22:6n3	DHA	59.08	0.2954	5.908
					C24:0	A. Lignocérico	0	0	0
					C24:1	A. nervonico	0	0	0
							Sum	1.0765
							110
					FA	Name	Concentration (mg/L)	Concentration (mg)	FA (mg*g DW)
					C6:0	Á. Caproico	0	0	0
					C8:0	A. Caprílico	0	0	0
					C10:0	A. Cáprico	0	0	0
					C11:0	A. Undecílico	0	0	0
					C12:0	A. Laurico	4.4	0.022	0.44
					C13:0	A. Tridecílico	0	0	0
					C14:0	A. Merístico	0	0	0
					C14:1	A. Miristoleico	0	0	0
					C15:0	A. Pentadecílico	2.15	0.01075	0.215
					C15:1	A. Pentadecenoico	0	0	0
					C16:0	A. Palmítico	83.82	0.4191	8.382
					C16:1	A. Palmitoleico	10.94	0.0547	1.094
					C17:0	A. Margárico	3.63	0.01815	0.363
					C17:1	A. Heptadecenoico	2.07	0.01035	0.207
					C18:0	A. Estearico	39.69	0.19845	3.969
					C18:1n9	A. Oleico	101.69	0.50845	10.169
					C18:2n6t	A. Linoelaidico	1.24	0.0062	0.124
					C18:2n6c	A. Linoleico	0	0	0
					C18:3n3	A. α-Linolenico	0	0	0
					C18:3n6	A. caléndico	0	0	0
					C20:0	A. Araquídico	0	0	0
					C20:1	A. Gadoleico	15.98	0.0799	1.598
					C20:2	A. Eicosadienoico	0	0	0
					C20:3n6	A. Dihomo-gamma-linolenico	0	0	0
					C20:3n3	A. eicosatrienoico	12.4	0.062	1.24
					C20:4n6	A. araquidonico	0	0	0
					C20:5n3	A. Eicosapentaenoico	0	0	0
					C21:0	A. heneicosanoico	0	0	0
					C22:0	A. Behenoico	0	0	0
					C22:1n9	A. Erúcico	2.32	0.0116	0.232
					C23:0	A. Tricosílico	6.23	0.03115	0.623
					C22:6n3	DHA	76.95	0.38475	7.695
					C24:0	A. Lignocérico	1.44	0.0072	0.144
					C24:1	A. nervonico	0	0	0
							Sum	1.82475
							680
					FA	Name	Concentration (mg/L)	Concentration (mg)	FA (mg*g DW)
					C6:0	Á. Caproico	0	0	0
					C8:0	A. Caprílico	0	0	0
					C10:0	A. Cáprico	0	0	0
					C11:0	A. Undecílico	0	0	0
					C12:0	A. Laurico	0	0	0
					C13:0	A. Tridecílico	0	0	0
					C14:0	A. Merístico	0	0	0
					C14:1	A. Miristoleico	0	0	0
					C15:0	A. Pentadecílico	0	0	0
					C15:1	A. Pentadecenoico	0	0	0
					C16:0	A. Palmítico	7.12	0.0356	0.712
					C16:1	A. Palmitoleico	1.24	0.0062	0.124
					C17:0	A. Margárico	0	0	0
					C17:1	A. Heptadecenoico	0	0	0
					C18:0	A. Estearico	4.02	0.0201	0.402
					C18:1n9	A. Oleico	10.53	0.05265	1.053
					C18:2n6t	A. Linoelaidico	0	0	0
					C18:2n6c	A. Linoleico	0	0	0
					C18:3n3	A. α-Linolenico	0	0	0
					C18:3n6	A. caléndico	0	0	0
					C20:0	A. Araquídico	0	0	0
					C20:1	A. Gadoleico	1.23	0.00615	0.123
					C20:2	A. Eicosadienoico	0	0	0
					C20:3n6	A. Dihomo-gamma-linolenico	0	0	0
					C20:3n3	A. eicosatrienoico	1.65	0.00825	0.165
					C20:4n6	A. araquidonico	0	0	0
					C20:5n3	A. Eicosapentaenoico	2.04	0.0102	0.204
					C21:0	A. heneicosanoico	0	0	0
					C22:0	A. Behenoico	0	0	0
					C22:1n9	A. Erúcico	0	0	0
					C23:0	A. Tricosílico	3.75	0.01875	0.375
					C22:6n3	DHA	36.52	0.1826	3.652
					C24:0	A. Lignocérico	0	0	0
					C24:1	A. nervonico	0	0	0
							Sum	0.3405
							853
					FA	Name	Concentration (mg/L)	Concentration (mg)	FA (mg*g DW)
					C6:0	Á. Caproico	0	0	0
					C8:0	A. Caprílico	0	0	0
					C10:0	A. Cáprico	0	0	0
					C11:0	A. Undecílico	0	0	0
					C12:0	A. Laurico	0	0	0
					C13:0	A. Tridecílico	0	0	0
					C14:0	A. Merístico	0	0	0
					C14:1	A. Miristoleico	0	0	0
					C15:0	A. Pentadecílico	0	0	0
					C15:1	A. Pentadecenoico	0	0	0
					C16:0	A. Palmítico	3.49	0.01745	0.349
					C16:1	A. Palmitoleico	1.24	0.0062	0.124
					C17:0	A. Margárico	0	0	0
					C17:1	A. Heptadecenoico	0	0	0
					C18:0	A. Estearico	2.08	0.0104	0.208
					C18:1n9	A. Oleico	2.66	0.0133	0.266
					C18:2n6t	A. Linoelaidico	0	0	0
					C18:2n6c	A. Linoleico	0	0	0
					C18:3n3	A. α-Linolenico	0	0	0
					C18:3n6	A. caléndico	0	0	0
					C20:0	A. Araquídico	0	0	0
					C20:1	A. Gadoleico	0	0	0
					C20:2	A. Eicosadienoico	0	0	0
					C20:3n6	A. Dihomo-gamma-linolenico	0	0	0
					C20:3n3	A. eicosatrienoico	0	0	0
					C20:4n6	A. araquidonico	0	0	0
					C20:5n3	A. Eicosapentaenoico	0	0	0
					C21:0	A. heneicosanoico	0	0	0
					C22:0	A. Behenoico	0	0	0
					C22:1n9	A. Erúcico	0	0	0
					C23:0	A. Tricosílico	0	0	0
					C22:6n3	DHA	5.19	0.02595	0.519
					C24:0	A. Lignocérico	0	0	0
					C24:1	A. nervonico	0	0	0
							Sum	0.0733
							117
					FA	Name	Concentration (mg/L)	Concentration (mg)	FA (mg*g DW)
					C6:0	Á. Caproico	0	0	0
					C8:0	A. Caprílico	0	0	0
					C10:0	A. Cáprico	0	0	0
					C11:0	A. Undecílico	0	0	0
					C12:0	A. Laurico	0	0	0
					C13:0	A. Tridecílico	0	0	0
					C14:0	A. Merístico	0	0	0
					C14:1	A. Miristoleico	0	0	0
					C15:0	A. Pentadecílico	0	0	0
					C15:1	A. Pentadecenoico	0	0	0
					C16:0	A. Palmítico	8.88	0.0444	0.888
					C16:1	A. Palmitoleico	2.37	0.01185	0.237
					C17:0	A. Margárico	0	0	0
					C17:1	A. Heptadecenoico	0	0	0
					C18:0	A. Estearico	5.69	0.02845	0.569
					C18:1n9	A. Oleico	9.89	0.04945	0.989
					C18:2n6t	A. Linoelaidico	0	0	0
					C18:2n6c	A. Linoleico	0	0	0
					C18:3n3	A. α-Linolenico	0	0	0
					C18:3n6	A. caléndico	0	0	0
					C20:0	A. Araquídico	0	0	0
					C20:1	A. Gadoleico	2.63	0.01315	0.263
					C20:2	A. Eicosadienoico	0	0	0
					C20:3n6	A. Dihomo-gamma-linolenico	0	0	0
					C20:3n3	A. eicosatrienoico	2.42	0.0121	0.242
					C20:4n6	A. araquidonico	0	0	0
					C20:5n3	A. Eicosapentaenoico	0	0	0
					C21:0	A. heneicosanoico	0	0	0
					C22:0	A. Behenoico	0	0	0
					C22:1n9	A. Erúcico	0	0	0
					C23:0	A. Tricosílico	0	0	0
					C22:6n3	DHA	12.55	0.06275	1.255
					C24:0	A. Lignocérico	0	0	0
					C24:1	A. nervonico	0	0	0
							Sum	0.22215
							103
					FA	Name	Concentration (mg/L)	Concentration (mg)	FA (mg*g DW)
					C6:0	Á. Caproico	0	0	0
					C8:0	A. Caprílico	0	0	0
					C10:0	A. Cáprico	0	0	0
					C11:0	A. Undecílico	0	0	0
					C12:0	A. Laurico	0	0	0
					C13:0	A. Tridecílico	0	0	0
					C14:0	A. Merístico	0	0	0
					C14:1	A. Miristoleico	0	0	0
					C15:0	A. Pentadecílico	0	0	0
					C15:1	A. Pentadecenoico	0	0	0
					C16:0	A. Palmítico	4.36	0.0218	0.436
					C16:1	A. Palmitoleico	1.31	0.00655	0.131
					C17:0	A. Margárico	0	0	0
					C17:1	A. Heptadecenoico	0	0	0
					C18:0	A. Estearico	2.58	0.0129	0.258
					C18:1n9	A. Oleico	5.15	0.02575	0.515
					C18:2n6t	A. Linoelaidico	0	0	0
					C18:2n6c	A. Linoleico	0	0	0
					C18:3n3	A. α-Linolenico	0	0	0
					C18:3n6	A. caléndico	0		0
					C20:0	A. Araquídico	0	0	0
					C20:1	A. Gadoleico	0	0	0
					C20:2	A. Eicosadienoico	0	0	0
					C20:3n6	A. Dihomo-gamma-linolenico	0	0	0
					C20:3n3	A. eicosatrienoico	0	0	0
					C20:4n6	A. araquidonico	0	0	0
					C20:5n3	A. Eicosapentaenoico	0	0	0
					C21:0	A. heneicosanoico	0	0	0
					C22:0	A. Behenoico	0	0	0
					C22:1n9	A. Erúcico	0	0	0
					C23:0	A. Tricosílico	0	0	0
					C22:6n3	DHA	6.12	0.0306	0.612
					C24:0	A. Lignocérico	0	0	0
					C24:1	A. nervonico	0	0	0
							Sum	0.0976
							12
					FA	Name	Concentration (mg/L)	Concentration (mg)	FA (mg*g DW)
					C6:0	Á. Caproico	0	0	0
					C8:0	A. Caprílico	0	0	0
					C10:0	A. Cáprico	0	0	0
					C11:0	A. Undecílico	0	0	0
					C12:0	A. Laurico	0	0	0
					C13:0	A. Tridecílico	0	0	0
					C14:0	A. Merístico	0	0	0
					C14:1	A. Miristoleico	0	0	0
					C15:0	A. Pentadecílico	0	0	0
					C15:1	A. Pentadecenoico	0	0	0
					C16:0	A. Palmítico	3	0.015	0.3
					C16:1	A. Palmitoleico	0	0	0
					C17:0	A. Margárico	0	0	0
					C17:1	A. Heptadecenoico	0	0	0
					C18:0	A. Estearico	1.86	0.0093	0.186
					C18:1n9	A. Oleico	2.06	0.0103	0.206
					C18:2n6t	A. Linoelaidico	0	0	0
					C18:2n6c	A. Linoleico	0	0	0
					C18:3n3	A. α-Linolenico	0	0	0
					C18:3n6	A. caléndico	0	0	0
					C20:0	A. Araquídico	0	0	0
					C20:1	A. Gadoleico	0	0	0
					C20:2	A. Eicosadienoico	0	0	0
					C20:3n6	A. Dihomo-gamma-linolenico	0	0	0
					C20:3n3	A. eicosatrienoico	0	0	0
					C20:4n6	A. araquidonico	0	0	0
					C20:5n3	A. Eicosapentaenoico	0	0	0
					C21:0	A. heneicosanoico	0	0	0
					C22:0	A. Behenoico	0	0	0
					C22:1n9	A. Erúcico	0	0	0
					C23:0	A. Tricosílico	0	0	0
					C22:6n3	DHA	0	0	0
					C24:0	A. Lignocérico	0	0	0
					C24:1	A. nervonico	0	0	0
							Sum	0.0346
